# Supplementary material for: Molecular Detection and Characterization of Pasteurella multocida Infecting Camels in Marsabit and Turkana Counties, Kenya
Source: Research Square preprint supplement (doi:10.21203/rs.3.rs-923714/v1), 2021-10-13
Supplement: Supplementary file 1 [file 46ed42bef3cec9f4609a0bc6.docx]

**Table 6**

| **Isolate ID** | **Homologous sequences** | **Identity %** |
| --- | --- | --- |
| TUR/LOK/C13 | Kmt1 | 100 |
| TUR/NAD/C2 | hydrolase family protein | 100 |
| MAR/GAL/C2 | hydrolase family protein | 100 |
| MAR/MAL/C8 | Kmt1 | 99.34 |
| MAR/ELB/C32 | outer membrane protein | 100 |
| MAR/NRD/C7 | hydrolase family protein | 100 |
| MAR/NRD/C3 | hydrolase family protein | 100 |
| MAR/NRB/C11 | hydrolase family protein | 100 |
| MAR/MLE/C13 | Kmt1 | 100 |
| MAR/MLE/C19 | Kmt1 | 99.27 |
| MAR/ELB/C30 | outer membrane protein | 99.3 |
| MAR/ELB/C33 | outer membrane protein | 100 |
| MAR/MAL/C2 | alpha/beta hydrolase | 100 |
| MAR/MAL/C10 | alpha/beta hydrolase | 100 |
| MAR/MAL/C6 | Kmt1 | 100 |
| MAR/GAL/C18 | hydrolase family protein | 100 |
| MAR/GAL/C24 | alpha/beta hydrolase | 100 |
| TUR/NAD/C1 | outer membrane protein | 100 |
| TUR/NAD/C11 | Kmt1 | 100 |
| TUR/LOK/C14 | alpha/beta hydrolase | 100 |
