# Supplementary material for: Molecular Detection and Characterization of Pasteurella multocida Infecting Camels in Marsabit and Turkana Counties, Kenya
Source: Research Square preprint supplement (doi:10.21203/rs.3.rs-923714/v1), 2021-10-13
Supplement: Supplementary file 2 [file 5b94fdcd97a4c0ec2d74ce79.docx]

**Table 7**

| **isolate ID** | **Homologous sequences** | **Identity %** |
| --- | --- | --- |
| CapMAR/MAL/C8 | putative glycosyltransferase EcbJ | 99 |
| CapTUR/LOK/C13 | putative glycosyltransferase EcbJ | 100 |
| CapMAR/GAL/C20 | putative glycosyltransferase EcbJ | 100 |
| CapMAR/NRB/C11 | putative glycosyltransferase EcbJ | 99 |
| CapTUR/NAD/C1 | putative glycosyltransferase EcbJ | 99 |
| CapMAR/MLE/C19 | putative glycosyltransferase EcbJ | 100 |
| CapMAR/ELB/C32 | putative glycosyltransferase EcbJ | 100 |
| CapTUR/LOK/C14 | putative glycosyltransferase EcbJ | 100 |
| CapTUR/LOR/C11 | putative glycosyltransferase EcbJ | 95 |
| CapTUR/NAD/C2 | putative glycosyltransferase EcbJ | 100 |
| CapMAR/NRB/C3 | putative glycosyltransferase EcbJ | 100 |
| CapMAR/MLE/C13 | putative glycosyltransferase EcbJ 90 | | |  |
| CapMAR/MAL/C6 | putative glycosyltransferase EcbJ | 97 |
| CapMAR/GAL/C24 | putative glycosyltransferase EcbJ | 97 |
| CapMAR/NRB/C7 | putative glycosyltransferase EcbJ | 100 |
| CapMAR/ELB/C33 | putative glycosyltransferase EcbJ | 82 |
| CapMAR/MAL/C2 | putative glycosyltransferase EcbJ | 100 |
| CapMAR/MAL/C10 | putative glycosyltransferase EcbJ | 97 |
| CapMAR/GAL/C18 | putative glycosyltransferase EcbJ | 99 |
| capMAR/ELB/C30 | putative glycosyltransferase EcbJ | 100 |
