# Supplementary material for: Molecular Detection and Characterization of Pasteurella multocida Infecting Camels in Marsabit and Turkana Counties, Kenya
Source: Research Square preprint supplement (doi:10.21203/rs.3.rs-923714/v1), 2021-10-13
Supplement: Supplementary file 3 [file 5ecb1d385798abce1d7f4467.docx]

**Table 2**

Isolate ID Homologous sequence E. Values ID (%)

TUR/LOK/C13 p. multocida 0.0 99

TUR/NAD/C2 p. multocida 0.0 99

MAR/GAL/C20 p. multocida 0.0 100

MAR/MAL/C8 p. multocida 0.0 99

MAR/ELB/C32 p. multocida 0.0 99

MAR/NRB/C7 p. multocida 0.0 99

MAR/NRB/C3 p. multocida 0.0 99

MAR/NRB/C11 p. multocida 0.0 99

MAR/MLE/C13 p. multocida 0.0 100

MAR/MLE/C19 p. multocida 0.0 100

MAR/ELB/C30 p. multocida 0.0 100

MAR/ELB/C33 p. multocida 0.0 99

MAR/MAL/C2 p. multocida 0.0 99

MAR/MAL/C10 p. multocida 5e-93 99

MAR/MAL/C6 p. multocida 0.0 100

MAR/GAL/C18 p. multocida 4e-99 100

MAR/GAL/C24 p. multocida 7e-133 99

TUR/NAD/C1 p. multocida 2e-123 100

TUR/NAD/C11 p. multocida 9e-101 99

TUR/LOK/C14 p. multocida 8e-122 99

TUR/LOR/C11 p. multocida 0.0 99
