# Supplementary material for: Molecular Detection and Characterization of Pasteurella multocida Infecting Camels in Marsabit and Turkana Counties, Kenya
Source: Research Square preprint supplement (doi:10.21203/rs.3.rs-923714/v1), 2021-10-13
Supplement: Supplementary file 5 [file 94382288b71f9b472bf7dbd5.docx]

**Table 1**

P.multocida Capsular

County Location N n (%) n (%)

Marsabit Laisamis-moile 10 2 (20) 2 (20)

Nairibu 12 3 (25) 3 (25)

Malabot 16 4 (25) 4 (25)

El burumagado 8 3 (38) 3 (38)

Galas 15 3 (20) 3 (20)

Turkana Nadapal 11 3 (27) 2(18)

Lokolia 30 2 (7) 2 (7)

Lokore 30 1 (3) 1 (3)

Total **132 21 20**
