# Supplementary material for: Molecular Detection and Characterization of Pasteurella multocida Infecting Camels in Marsabit and Turkana Counties, Kenya
Source: Research Square preprint supplement (doi:10.21203/rs.3.rs-923714/v1), 2021-10-13
Supplement: Supplementary file 7 [file c9ce6a1b8b9edef98644b576.docx]

**Table 3**

Isolate ID Homologous sequence E. Values ID (%)

TUR/LOK/C13 p. multocida capsule biosynthesis gene 0.0 100

MAR/GAL/C20 p. multocida capsule biosynthesis gene 0.0 100

MAR/MAL/C8 p. multocida capsule biosynthesis gene 0.0 100

MAR/ELB/C32 p. multocida capsule biosynthesis gene 4e-46 100

MAR/NRB/C7 p. multocida capsule biosynthesis gene 8e-19 100

MAR/NRB/C3 p. multocida capsule biosynthesis gene 5e-21 100

MAR/NRB/C11 p. multocida capsule biosynthesis gene 1e-176 100

MAR/MLE/C13 p. multocida capsule biosynthesis gene 8e-46 100

MAR/MLE/C19 p. multocida capsule biosynthesis gene 0.0 100

MAR/ELB/C30 p. multocida capsule biosynthesis gene 2e-54 100

MAR/ELB/C33 p. multocida capsule biosynthesis gene 2e-168 100

MAR/MAL/C2 p. multocida capsule biosynthesis gene 0.0 100

MAR/MAL/C10 p. multocida capsule biosynthesis gene 0.0 100

MAR/MAL/C6 p. multocida capsule biosynthesis gene 8e-49 100

MAR/GAL/C18 p. multocida capsule biosynthesis gene 0.0 100

MAR/GAL/C24 p. multocida capsule biosynthesis gene 2e-45 100

TUR/NAD/C1 p. multocida capsule biosynthesis gene 0.0 100

TUR/NAD/C11 p. multocida capsule biosynthesis gene 9e-101 100

TUR/LOK/C14 p. multocida capsule biosynthesis gene 1e-46 100

TUR/LOR/C11 p. multocida capsule biosynthesis gene 7e-15 100
