# Supplementary material for: Molecular Detection and Characterization of Pasteurella multocida Infecting Camels in Marsabit and Turkana Counties, Kenya
Source: Research Square preprint supplement (doi:10.21203/rs.3.rs-923714/v1), 2021-10-13
Supplement: Supplementary file 8 [file a13fd11ae10fd12a55cc1c39.docx]

**Table 5**

Cap. Amplicon Ref.

Type Gene Primer F / R size (bp)

CapA *hyaD-hyaC* TGCCAAAATCGCAGTGAG 1044 Townsend *et al*., 2001

TTGCCATCATTGTCAGTG

CapB *bcbD* CATTTATCCAAGCTCCACC 760 Townsend *et al*., 2001

GCCCGAGAGTTTCAATCC

CapD *dcbF* TTACAAAAGAAAGACTAGGAGCCC 657 Townsend *et al*., 2001

CATCTACCCACTCAACCATATCAG

CapE *ecbJ* TCCGCAGAAAATTATTGACTC 511 Townsend *et al*., 2001

GCTTGCTGCTTGATTTTGTC

CapF *fcbD* AATCGGAGAACGCAGAAATCAG 851 Townsend *et al*., 2001

TTCCGCCGTCAATTACTCTG

*KMTI*  ATCCGCTATTTACCCAGTGG 460 Townsend *et al*., 1998

GCTGTAAACGAACTCGCCC
