# Supplementary figures and images for: Molecular Detection and Characterization of Pasteurella multocida Infecting Camels in Marsabit and Turkana Counties, Kenya
Source: Research Square preprint supplement (doi:10.21203/rs.3.rs-923714/v1), 2021-10-13

**Table 4**


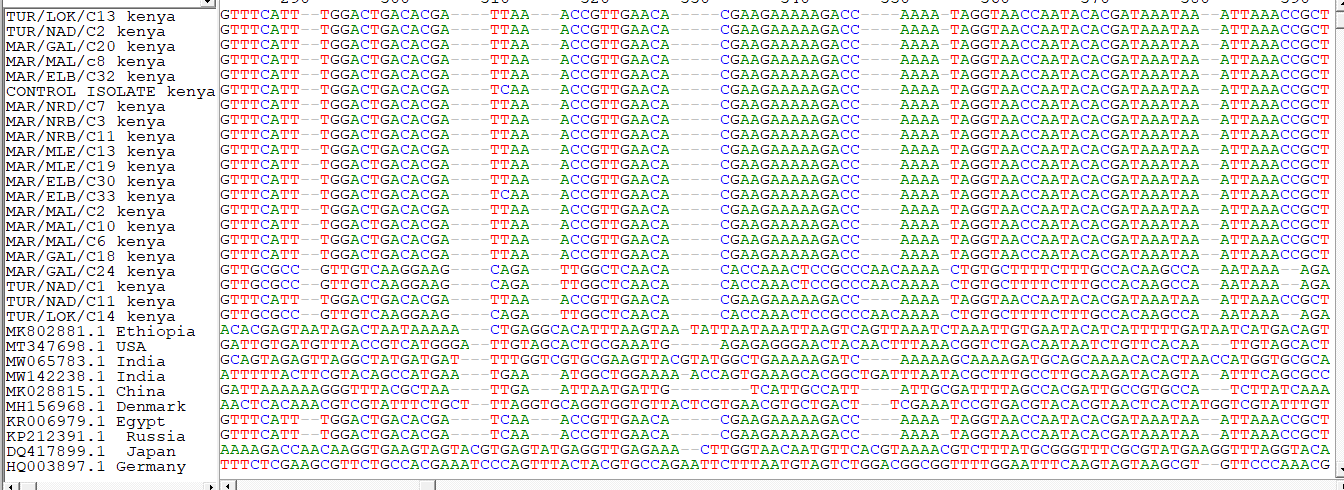

Supplement: Supplementary file 4 [file 8561a0e07f316e108f148d53.docx]
